# Supplementary material
Source: publisher site journal article supplement (https://www.kjim.org/upload/media/kjim-2025-056-supplementary-table-2.pdf)
Supplement: Supplementary file 1 [file kjim-2025-056-supplementary-table-2.pdf]

**Supplementary Table 2. Covariates included in the multivariate analyses**

| Covariates                            | Definition / Criteria                                                                          |
|---------------------------------------|------------------------------------------------------------------------------------------------|
| Age                                   | Continuous variable (in years) derived from patient demographic data.                          |
| Gender                                | Categorized as male or female.                                                                 |
| Insurance premium grade               | Categorized as low, middle, or high based on national health insurance premium tiers.          |
| Charlson comorbidity index            | Calculated using ICD-10 diagnostic codes, based on the method described by Sundararajan et al. |
| Diabetes                              | $\geq 2$ claims with a primary or secondary diagnosis within 1 year prior to the index date.   |
| Hypertension                          | $\geq 2$ claims with a primary or secondary diagnosis within 1 year prior to the index date.   |
| Hyperlipidemia                        | $\geq 2$ claims with a primary or secondary diagnosis within 1 year prior to the index date.   |
| Chronic obstructive pulmonary disease | $\geq 2$ claims with a primary or secondary diagnosis within 1 year prior to the index date.   |
| History of COVID-19 infection         | Presence of ICD-10 code U07.1 as a primary or secondary diagnosis prior to the index date.     |
